# Supplementary material for: Patient and public perspectives on cell and gene therapies: a systematic review
Source: PubMed Central journal article supplement (PMC7722871; doi:10.1038/s41467-020-20096-1), 2020-12-08
Supplement: 41467_2020_20096_MOESM2_ESM.pdf [file 41467_2020_20096_MOESM2_ESM.pdf]

**Editorial Note:** This manuscript has been previously reviewed at another journal that is not operating a transparent peer review scheme. This document only contains reviewer comments and rebuttal letters for versions considered at *Nature Communications*. Mentions of prior referee reports have been redacted.
